# Supplementary material for: In Vitro and In Vivo Inhibitory Effects of Gaseous Chlorine Dioxide against Fusarium oxysporum f. sp. batatas Isolated from Stored Sweetpotato: Study II
Source: PubMed Central journal article supplement — Plant Pathol J. 2019 Oct 1;35(5):437–44. doi: 10.5423/PPJ.OA.04.2019.0078 (PMC6788411; doi:10.5423/ppj.oa.04.2019.0078), 2019-10-01
Supplement: PPJ-35-437_Supple.pdf [file PPJ-35-437_Supple.pdf]

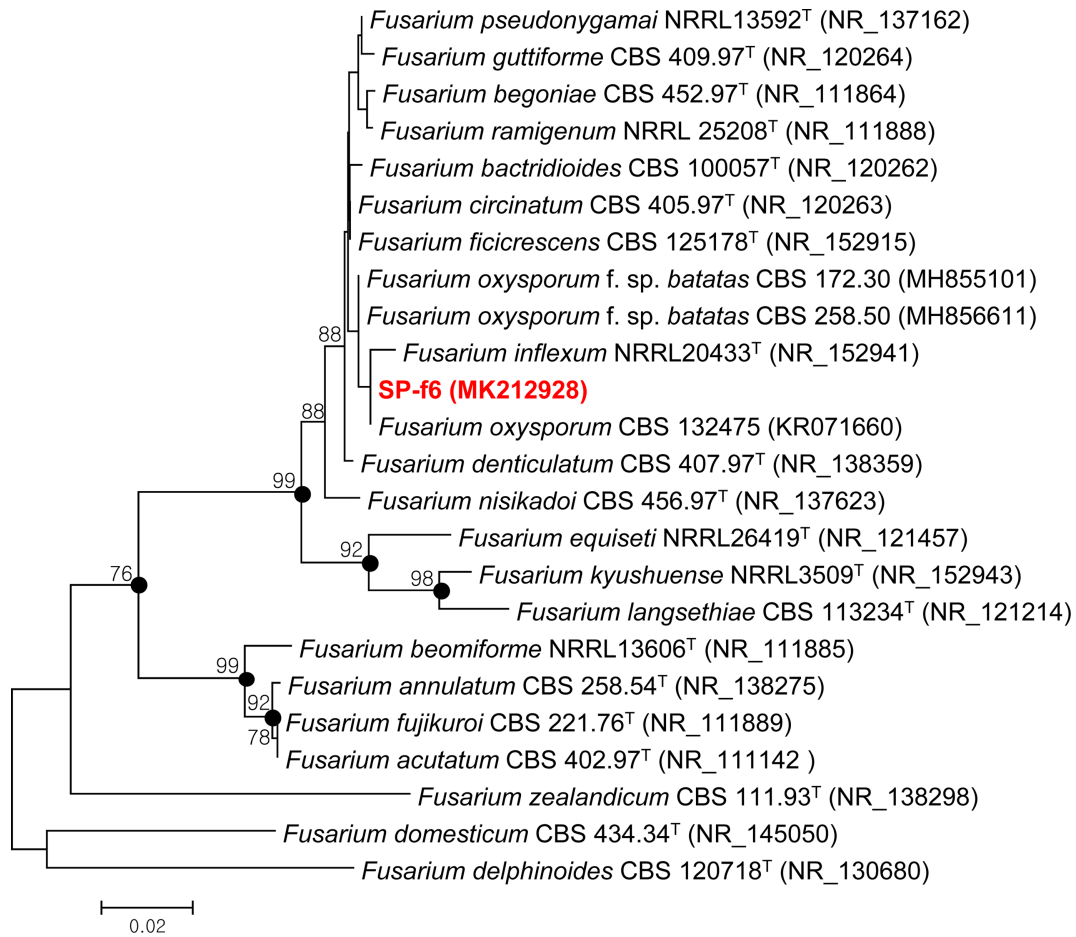

**Supplementary Fig. 1.** Neighbor-joining tree that shows the relationships between isolate SP-f6 (MK212928) and other members of the genus *Fusarium*, based on phylogenetic analyses of ITS1-5.8S-ITS2 region sequences. Filled circles on the branches indicate that the nodes were also recovered in the tree constructed by the maximum-likelihood algorithm. *Microdochium nivale* var. *majus* CBS 177.29 (MH855031) were used as outgroups (not shown). Scale bar, 2 nt substitution per 100 nt of the sequence.

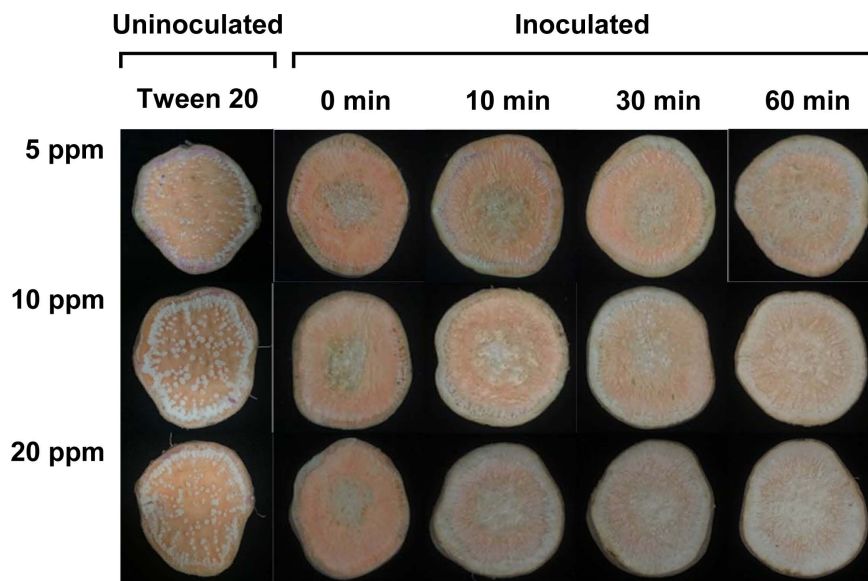

**Supplementary Fig. 2.** Photographs of sweetpotato (cv. Juwhangmi) slices at 14 days after drop-inoculation with *Fusarium oxysporum* f. sp. *batatas* SP-f6 ( $10 \mu\text{l}$  of  $5 \times 10^6$  spores/ml) following treatment with various  $\text{ClO}_2$  concentrations (5, 10, and 20 ppm) for 0, 10, 30, and 60 min.

**Supplementary Table 1.** Analysis of variance components including the degrees of freedom (df), sum of squares (SS), *F* ratio, and *P* value for lesion diameters and fungal populations of *Fusarium oxysporum* f. sp. *batatas* SP-f6 on inoculated slices and surface layers of sweetpotato roots followed by treatment with gaseous chlorine dioxide ( $\text{ClO}_2$ ), respectively

| Source of variation  | Lesion diameter (mm) <sup>a</sup> |      |          |          |              |       |          |          | Fungal population (log cfu/g dry weight) <sup>b</sup> |     |          |          |              |     |          |          |
|----------------------|-----------------------------------|------|----------|----------|--------------|-------|----------|----------|-------------------------------------------------------|-----|----------|----------|--------------|-----|----------|----------|
|                      | Experiment 1                      |      |          |          | Experiment 2 |       |          |          | Experiment 1                                          |     |          |          | Experiment 2 |     |          |          |
|                      | df                                | SS   | <i>F</i> | <i>P</i> | df           | SS    | <i>F</i> | <i>P</i> | df                                                    | SS  | <i>F</i> | <i>P</i> | df           | SS  | <i>F</i> | <i>P</i> |
| Concentration        | 2                                 | 63.4 | 3.3      | 0.0534   | 2            | 44.5  | 8.9      | 0.0013   | 1                                                     | 0.8 | 48.1     | <0.0001  | 1            | 0   | 1.4      | 0.2574   |
| Time                 | 3                                 | 63.7 | 2.2      | 0.1114   | 3            | 108.7 | 14.5     | <0.0001  | 2                                                     | 2.3 | 73.1     | <0.0001  | 2            | 0.9 | 20.9     | 0.0003   |
| Concentration × Time | 6                                 | 16   | 0.3      | 0.9415   | 6            | 28.1  | 1.9      | 0.1258   | 2                                                     | 1   | 29.4     | 0.0002   | 2            | 0   | 0.2      | 0.7999   |

<sup>a</sup>Sweetpotato slices were drop-inoculated with  $10 \mu\text{l}$  of spore suspension ( $5 \times 10^6$  spores/ml) of isolate SP-f6. They were then treated with various  $\text{ClO}_2$  concentrations (5, 10, and 20 ppm) for 0, 10, 30, and 60 min. Lesion diameters were assessed 14 days after incubation at  $28^\circ\text{C}$ .

<sup>b</sup>Sweetpotato roots were dipped in spore suspension ( $5 \times 10^6$  spores/ml) of isolate SP-f6 for 10 min and treated with different  $\text{ClO}_2$  concentrations (20 and 40 ppm) for 0, 30, and 60 min. After  $\text{ClO}_2$  gas treatment, colony-forming units (CFUs) on the surface layers of the roots were determined.
